# Supplementary material for: Depletion controlled surface deposition of uncharged colloidal spheres from stable bulk dispersions
Source: Royal Society of Chemistry journal article supplement (doi:10.1039/c5sm02892b), 2016-01-01
Supplement: c5sm02892b1.pdf [file c5sm02892b1.pdf]

**There is no supplementary information available for this article**
